# Supplementary material for: CRK proteins selectively regulate T cell migration into inflamed tissues
Source: JCI journal article supplement (doi:10.1172/jci77278), 2015-01-25
Supplement: sd1 [file 1]

**Supplemental Videos 1 and 2. Crk and CrkL are required for T cell diapedesis.**

WT (Video 1) or Crk/CrkL deficient (Video 2) T cells were added to TNF $\alpha$  treated 3B-11 endothelial monolayers. DIC images were collected every 30 seconds for 2h. Videos are shown at 8 frames/second. A phase contrast change is observed when T cells transmigrate through the endothelial monolayer. In Video 1, a T cell undergoing diapedesis is indicated with a red arrow while moving on top of the endothelium, and with a green arrow while migrating below the endothelium.
